# Supplementary material
Source: Springer Nature journal article supplement (https://www.springermedizin.de/resource/supplementary/12936_2007_456_MOESM4_ESM.pdf/9547490)

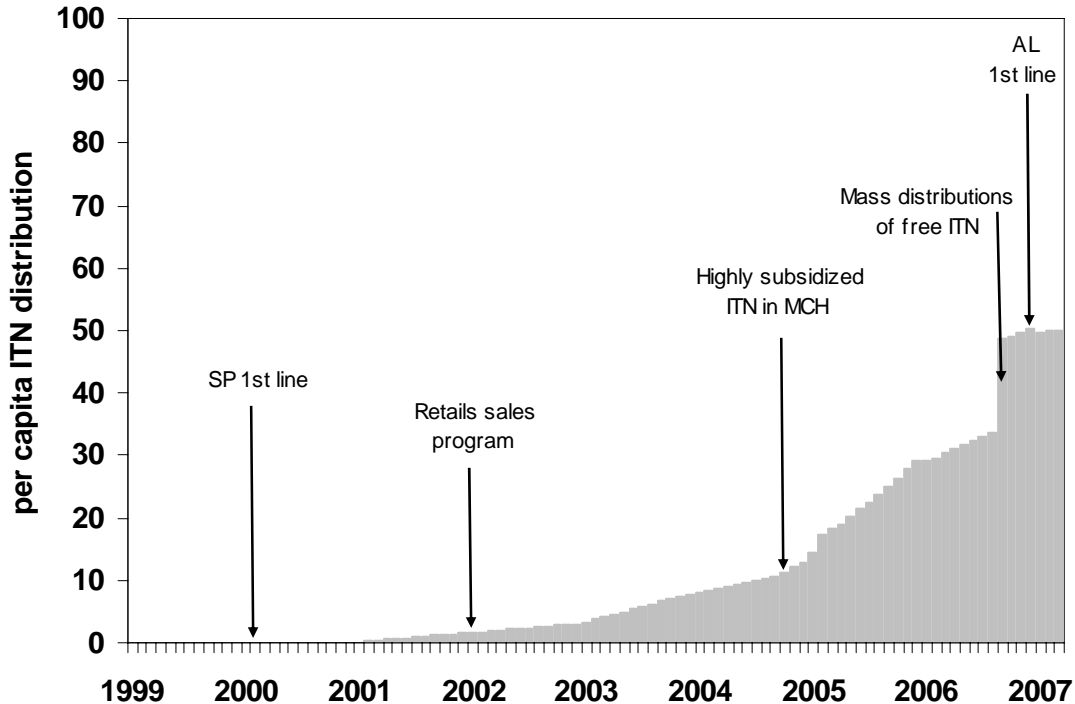

Supplement: MOESM4 [file 9547490]
